# Supplementary material
Source: PubMed Central journal article supplement (PMC5083667)
Supplement: 12192_2016_720_MOESM2_ESM.pdf [file 12192_2016_720_MOESM2_ESM.pdf]

**Online Ressource 2:** Mean normalized expression (MNE) of five Hsp70 isoforms in the muscle tissue of adult *T. inermis* (n=6 - 10) during 3 h and 6 h continuous heat shocks at 6 or 10°C followed by 6 h of recovery at control temperature (4°C; shaded). \*: Significant MNE difference to 4°C control temperature evaluated with a Kruskal-Wallis test. Figure was created using GraphPad Prism 6.0h.

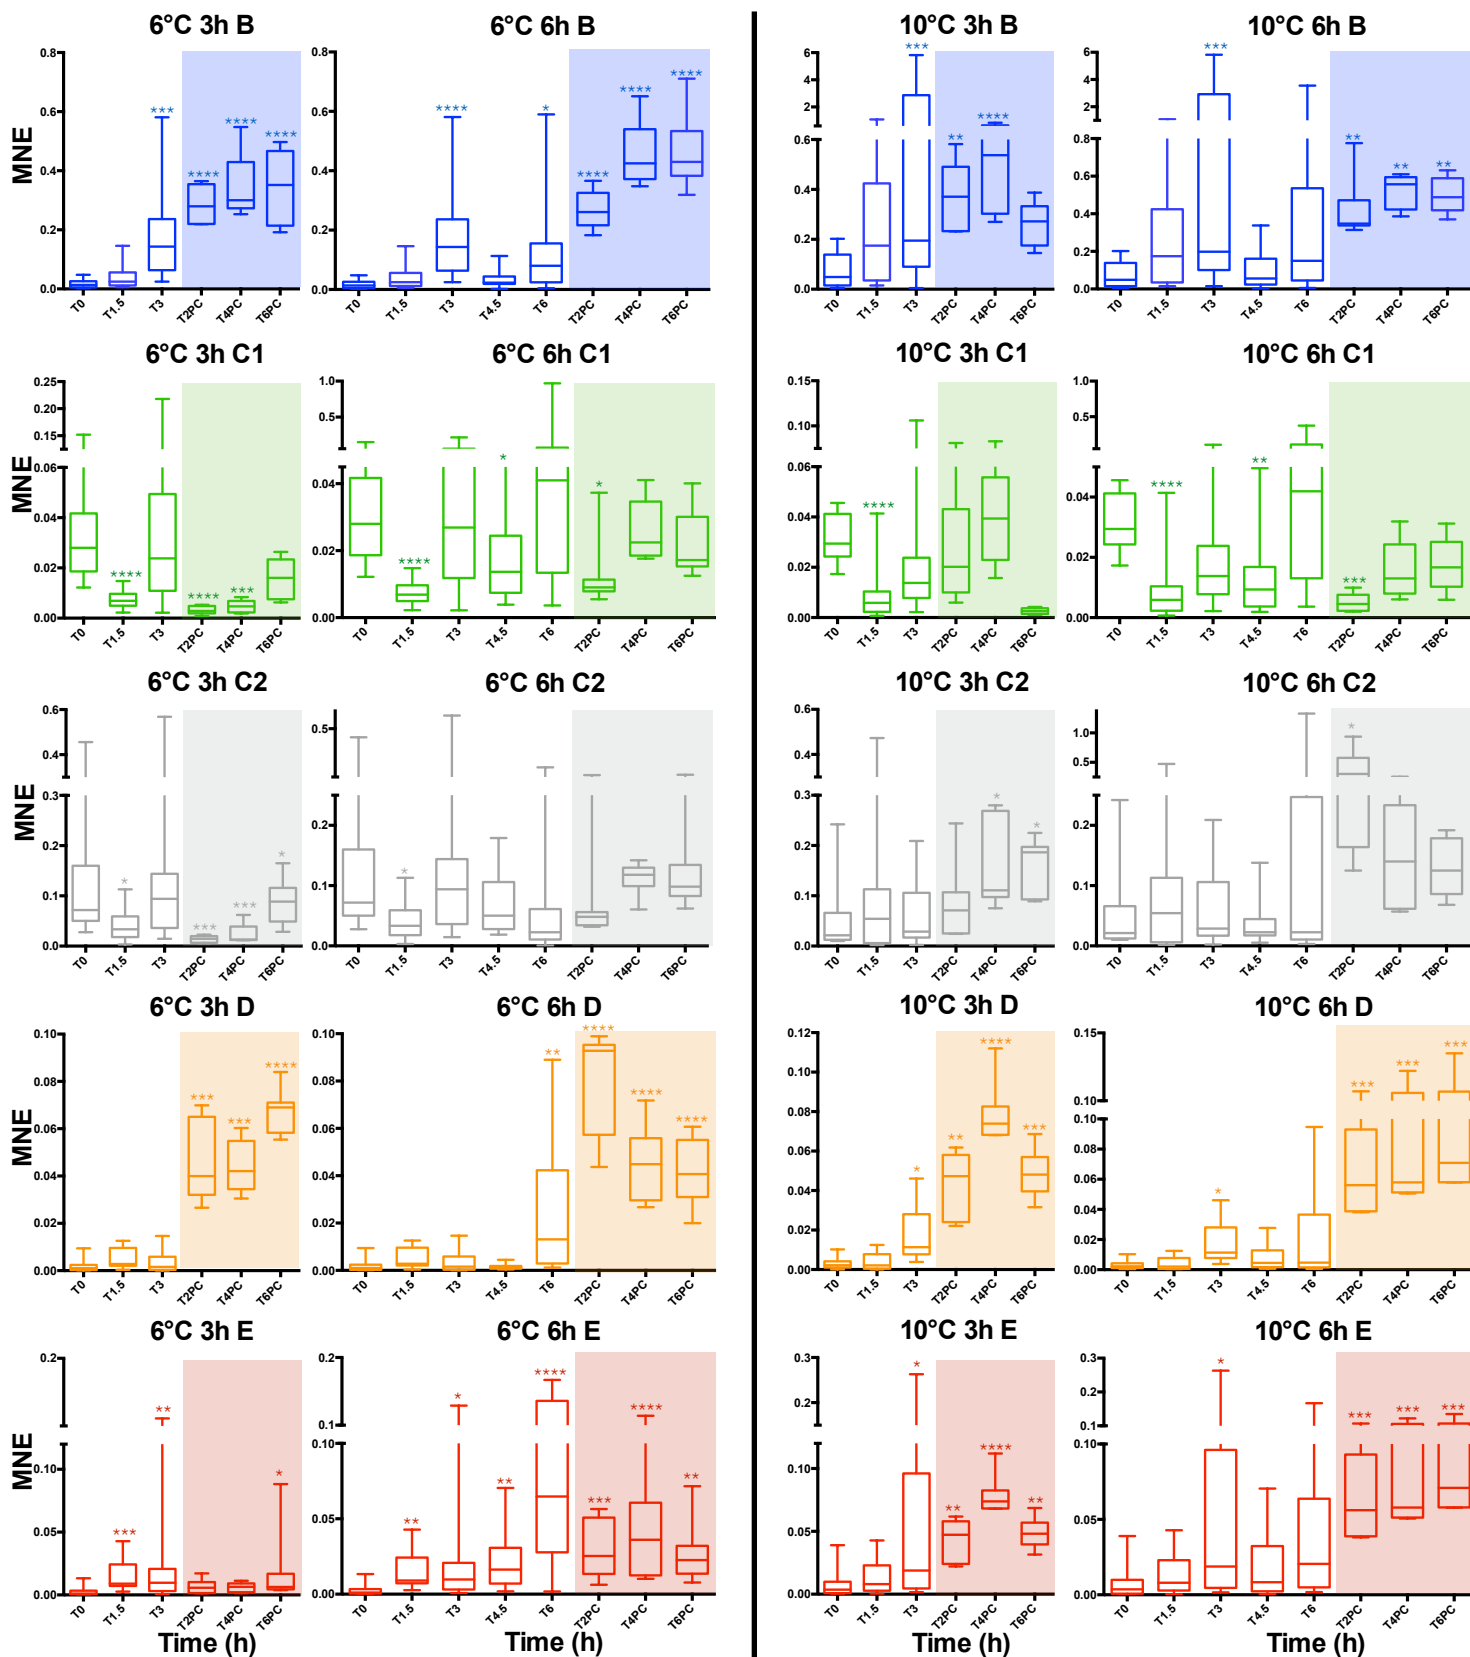

Responses of the arcto-boreal krill species *Thysanoessa inermis* to variations in water temperature: coupling Hsp70 isoform expressions with metabolism. Cell Stress & Chaperones. Kim Huenerlage, Kévin Cascella, Erwan Corre, Lola Toomey, Chi-Ying Lee, Friedrich Buchholz, Jean-Yves Toullec. jean-yves.toullec@sb-roscoff.fr
